# Supplementary material for: Identification of Immune-Related Prognostic Biomarkers Associated with HPV-Positive Head and Neck Squamous Cell Carcinoma
Source: Hindawi journal article supplement (doi:10.1155/2021/6661625), 2021-01-08
Supplement: f1 [file 6661625.f1.pdf]

Supplement Figure 1. The stability of this prognostic model was confirmed in HNSCC samples from TCGA.

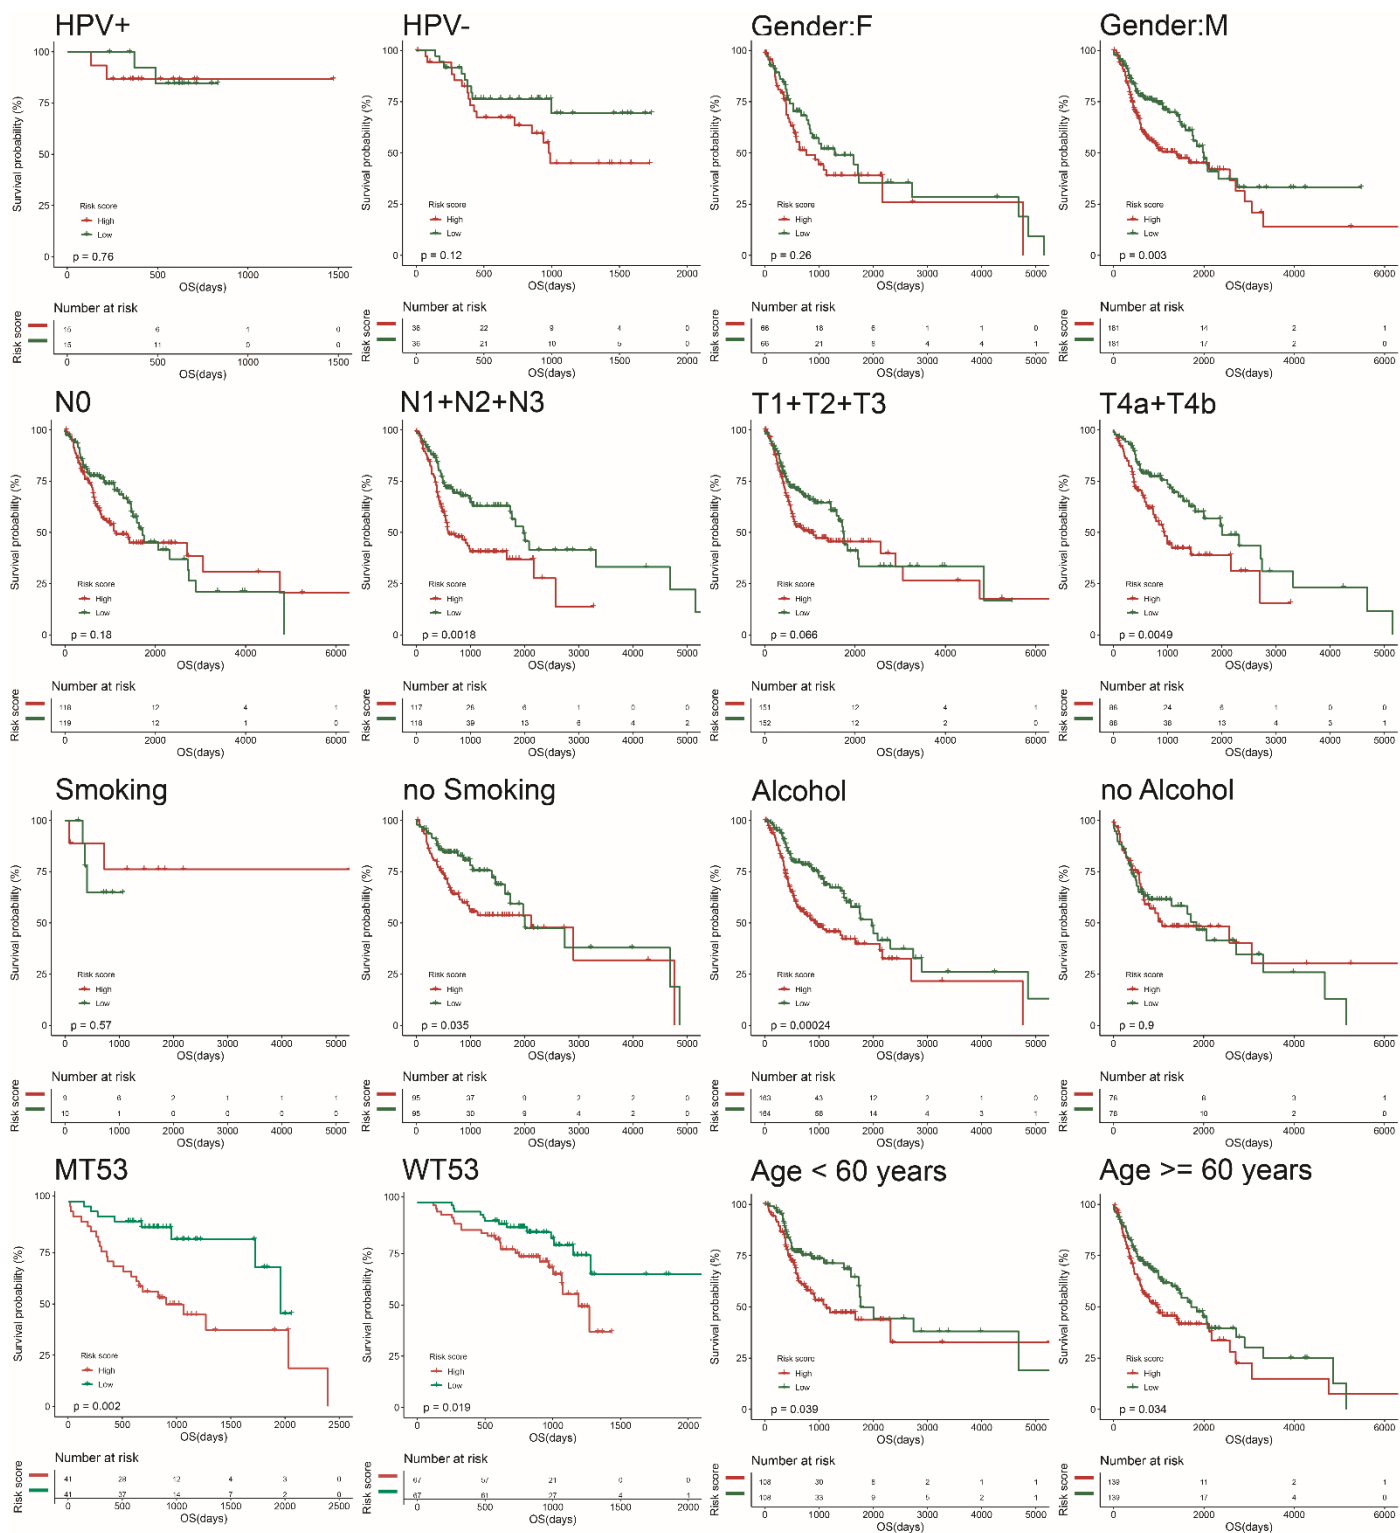

Supplement Table 1: Number of genes corresponding to each module

| Module    | No. of Genes |
|-----------|--------------|
| grey      | 219          |
| blue      | 186          |
| brown     | 128          |
| turquoise | 596          |
| yellow    | 66           |

Supplement Table 2: Univariate and multivariate analyses of prognostic factors and overall survival of HNSCC patients in TCGA cohort.

|           | Univariate analysis |              |               |          | Multivariate analysis |              |               |          |
|-----------|---------------------|--------------|---------------|----------|-----------------------|--------------|---------------|----------|
|           | HR                  | Low<br>95%CI | High<br>95%CI | P-value  | HR                    | Low<br>95%CI | High<br>95%CI | P-value  |
| N         | 1.14957002          | 0.988565     | 1.336797      | 0.070206 | –                     | –            | –             | –        |
| T         | 1.059054            | 0.919517     | 1.219766      | 0.426058 | –                     | –            | –             | –        |
| Age       | 1.02069555          | 1.007942     | 1.033611      | 0.001408 | 1.02                  | 1            | 1.03          | 0.014061 |
| Stage     | 1.08434272          | 0.931582     | 1.262153      | 0.295938 | –                     | –            | –             | –        |
| Gender    | 0.73316122          | 0.549764     | 0.977739      | 0.034581 | 0.85                  | 0.63         | 1.15          | 0.289519 |
| RiskScore | 1.72596464          | 1.288336     | 2.31225       | 0.000254 | 1.63                  | 1.21         | 2.2           | 0.001182 |
